# Supplementary material
Source: publisher site journal article supplement (https://oneecosystem.pensoft.net/article/download/suppl/4338654/)
Supplement: Supplementary file 1

Correlation between bioclimatic and topographic predictors

To minimize multicollinearity (Guisan and Thuiller 2005) within the original set of bio-climatic and topographic variables (19 and 2 respectively, Table S III.3), we applied Jolliffe’s Principal Component Analysis with the rejection method “B4”[[1]](#footnote-2) removing variables associated to components with eigenvalue < λ0 (usually 0.69≤ λ0≤ 0.74).

Table S III.1: Pearson’s correlation between bioclimatic and topographic predictors selected to minimize multicollinearity.

|  | **bio04** | **bio05** | **bio08** | **bio15** |
| --- | --- | --- | --- | --- |
| **bio04** |  |  |  |  |
| **bio05** | -0.005 |  |  |  |
| **bio08** | 0.511 | 0.233 |  |  |
| **bio15** | 0.027 | 0.484 | 0.080 |  |
| **mode_h** | -0.009 | -0.019 | -0.281 | 0.149 |

1. Jolliffe IT (1972) Discarding variables in a principal component analysis. I: artificial data. Applied Statistics, 2, 160–173. Jolliffe IT (1973) Discarding Variables in a Principal Component Analysis, II: Real Data. Applied Statistics 22: 21–31. [↑](#footnote-ref-2)
